# Supplementary material for: Constructing NiMoP nanorod arrays with a highly active Ni2P/NiMoP2 interface for hydrogen evolution in 0.5 M H2SO4 and 1.0 M KOH media
Source: Royal Society of Chemistry journal article supplement (doi:10.1039/d3qm00363a), 2023-01-01
Supplement: d3qm00363a1.pdf [file d3qm00363a1.pdf]

## Supporting Information for

### **Constructing NiMoP nanorod arrays with highly active Ni<sub>2</sub>P/NiMoP<sub>2</sub> interface for hydrogen evolution in 0.5 M H<sub>2</sub>SO<sub>4</sub> and 1.0 M KOH media**

Mengyao Ma, Wei Xia, Wenhao Liu, Xiaoyan Guo, Dong Cao\*, Daojian Cheng\*

State Key Laboratory of Organic-Inorganic Composites and Beijing Advanced  
Innovation Center for Soft Matter Science and Engineering, Beijing University of  
Chemical Technology, Beijing 100029, People's Republic of China

E-mail: [caod@mail.buct.edu.cn](mailto:caod@mail.buct.edu.cn), [chengdj@mail.buct.edu.cn](mailto:chengdj@mail.buct.edu.cn).

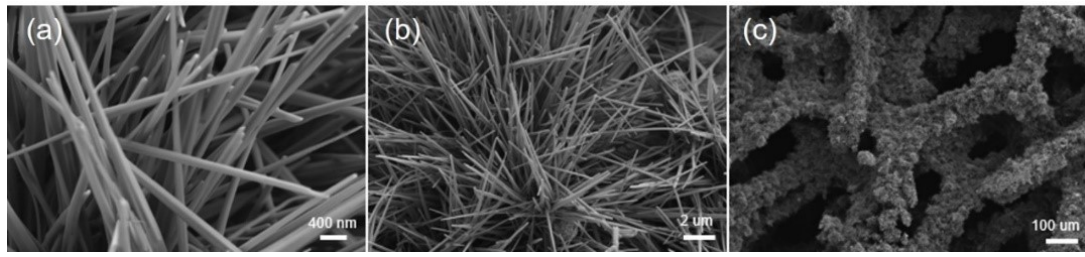

**Fig. S1** SEM images of NiMoP at different magnifications.

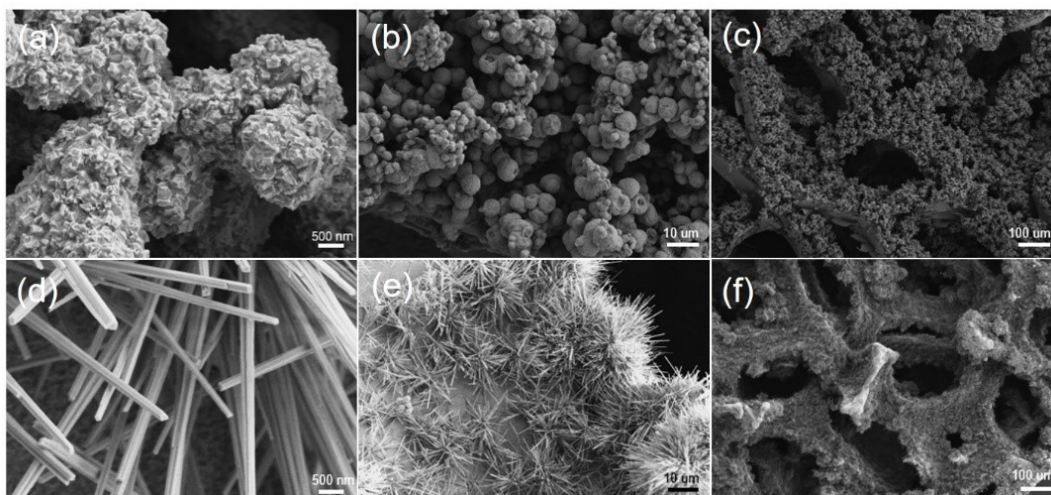

**Fig. S2** SEM images of  $\text{Ni}_2\text{P}$  (a-c) and  $\text{NiMoO}_4 \cdot x\text{H}_2\text{O}$  (d-f) at different magnifications.

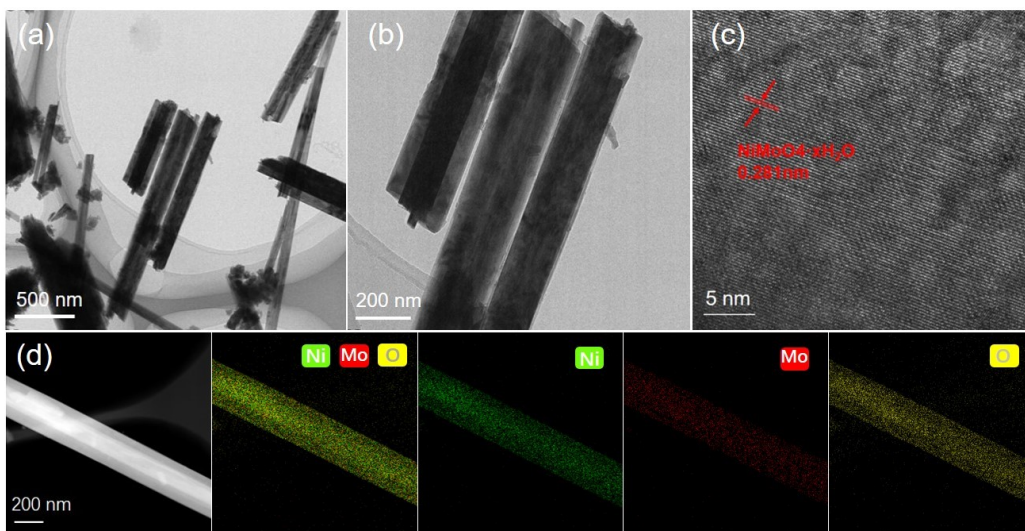

**Fig. S3** (a-b) TEM images of  $\text{NiMoO}_4 \cdot x\text{H}_2\text{O}$ . (c) HRTEM image of  $\text{NiMoO}_4 \cdot x\text{H}_2\text{O}$ . (d) Elemental mapping images of  $\text{NiMoO}_4 \cdot x\text{H}_2\text{O}$ .

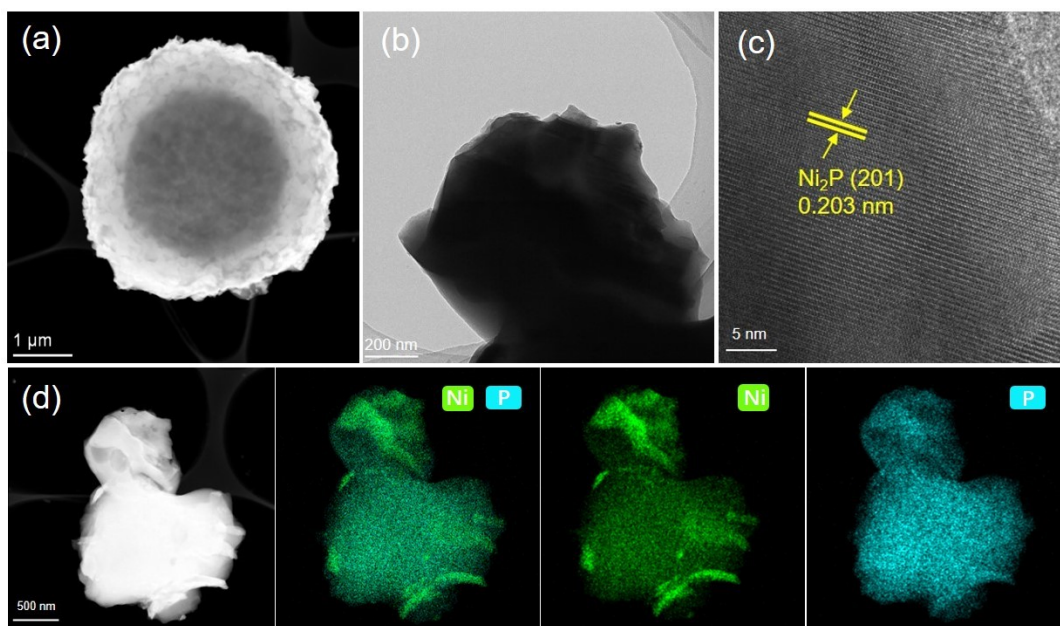

**Fig. S4** (a-c) STEM, TEM and HRTEM images of Ni<sub>2</sub>P. (d) Elemental mapping images of Ni<sub>2</sub>P.

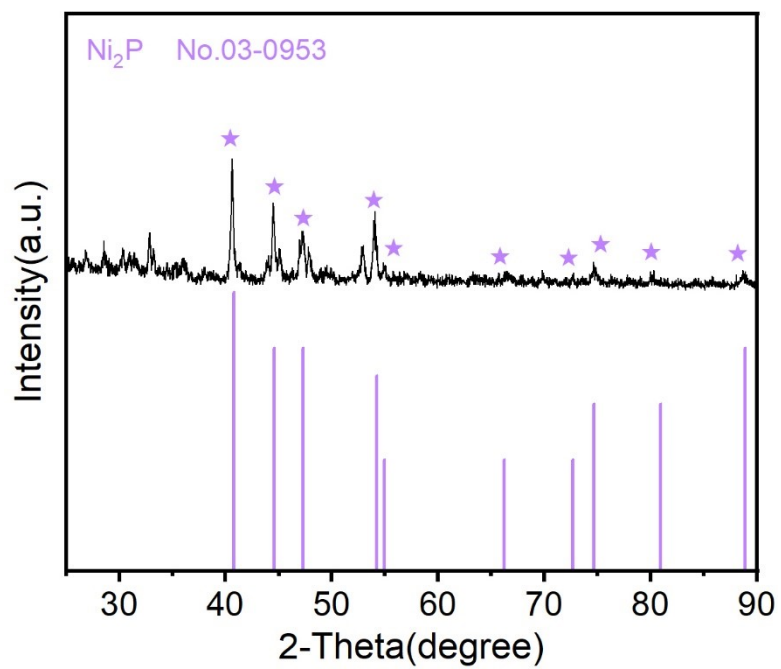

**Fig. S5** XRD pattern of the  $\text{Ni}_2\text{P}$ .

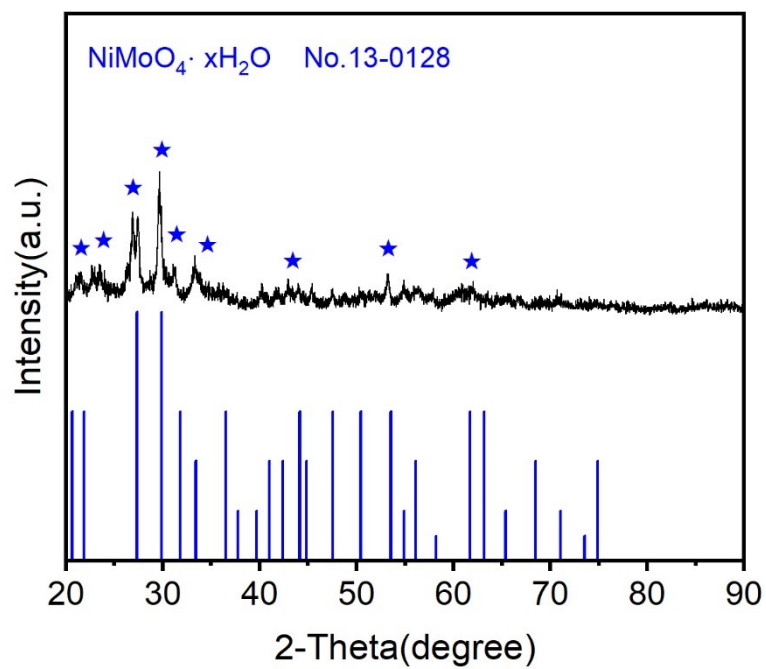

**Fig. S6** XRD pattern of the  $\text{NiMoO}_4 \cdot x\text{H}_2\text{O}$ .

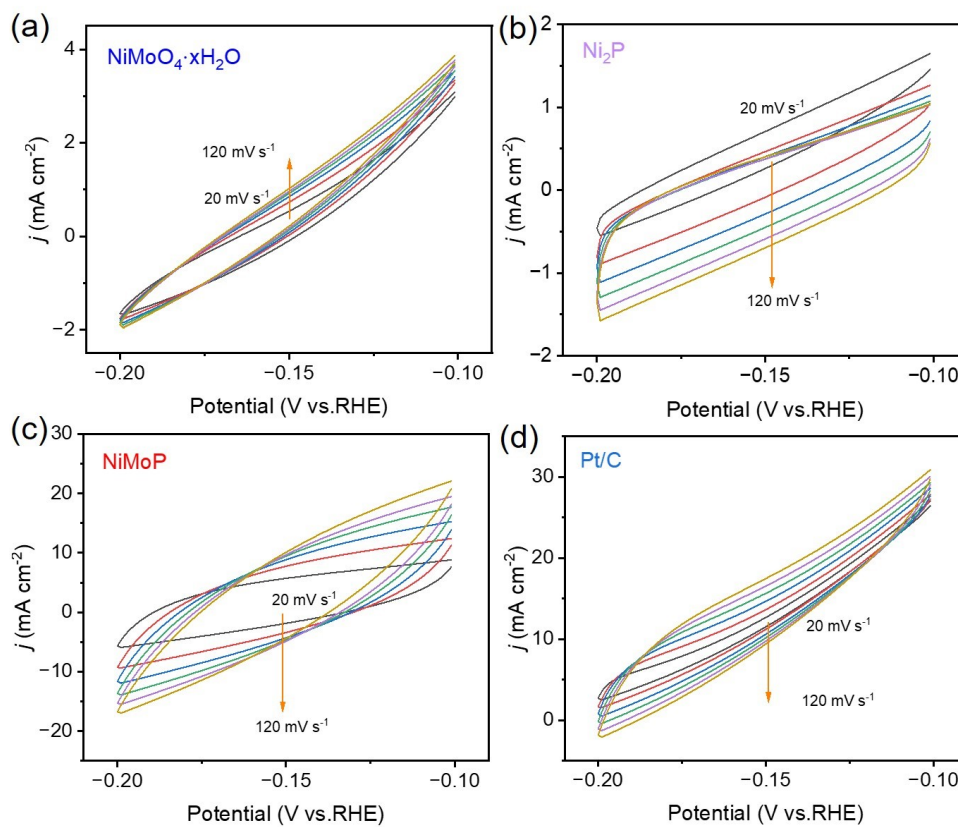

**Fig. S7** Double layer capacitance measurements for HER in 0.5 M H<sub>2</sub>SO<sub>4</sub> with scan rates from 20 to 120 mV s<sup>-1</sup> for (a) NiMoO<sub>4</sub>·xH<sub>2</sub>O, (b) Ni<sub>2</sub>P, (c) NiMoP, (d) Pt/C.



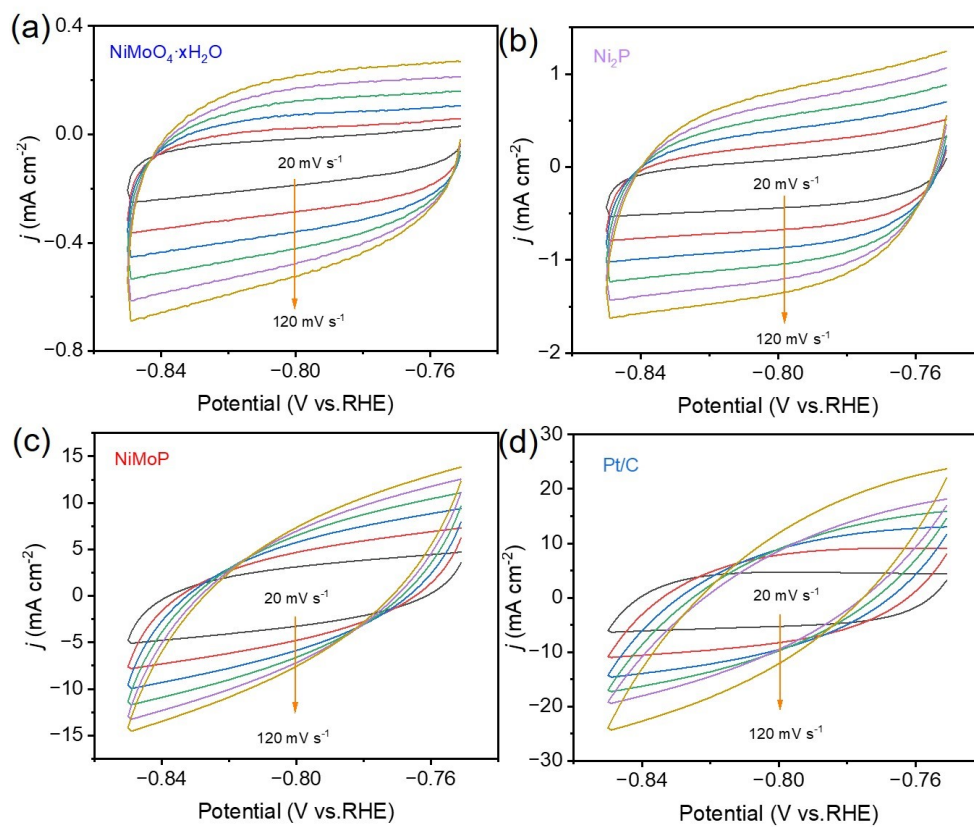

**Fig. S8** Double layer capacitance measurements for HER in 1.0 M KOH with scan rates from 20 to 120  $\text{mV s}^{-1}$  for (a)  $\text{NiMoO}_4 \cdot x\text{H}_2\text{O}$ , (b)  $\text{Ni}_2\text{P}$ , (c)  $\text{NiMoP}$ , (d)  $\text{Pt/C}$ .

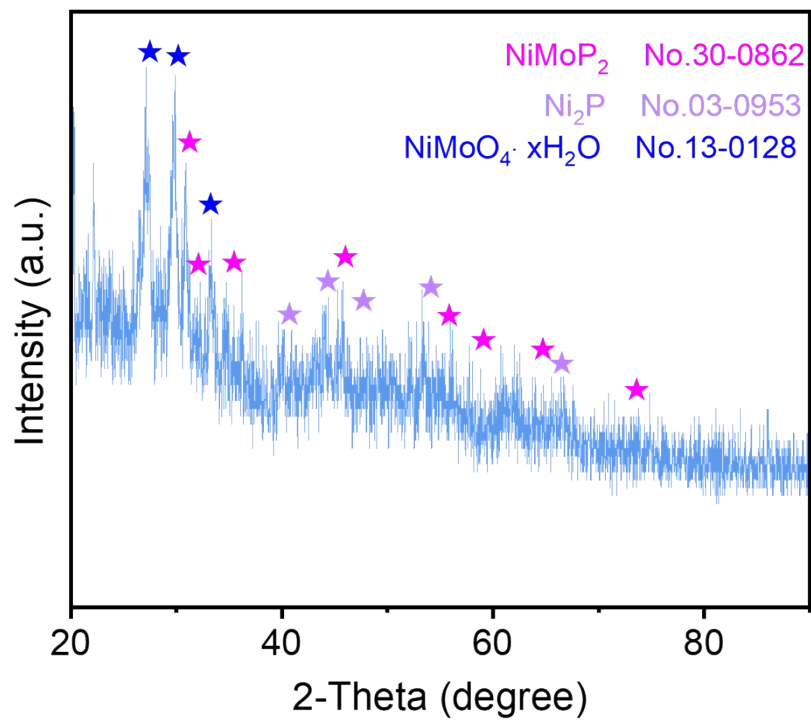

**Fig. S9** XRD pattern of NiMoP after 1000 cycles test in 0.5 M H<sub>2</sub>SO<sub>4</sub>.

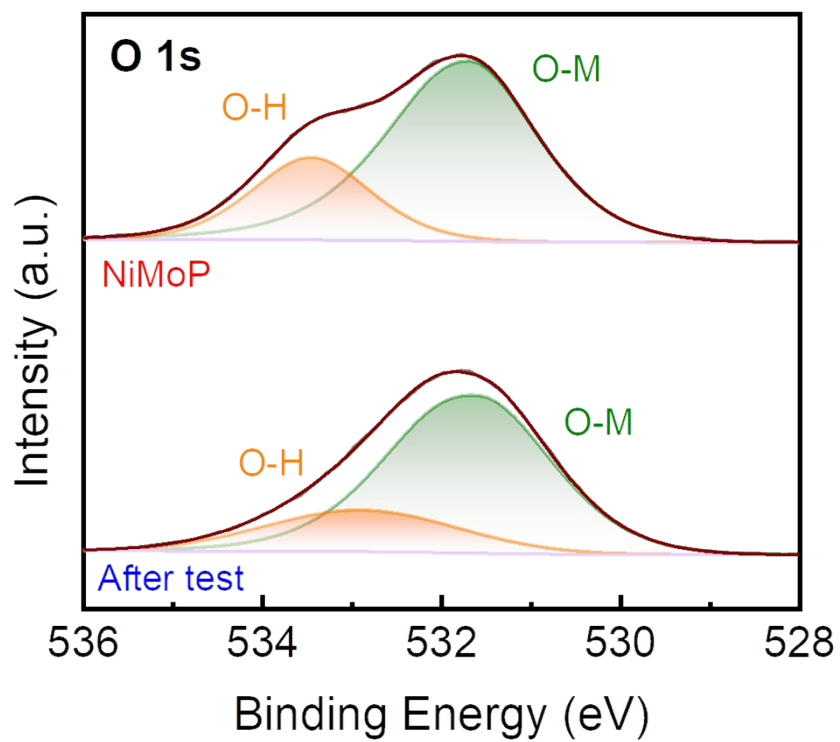

**Fig. S10** High-resolution XPS spectra of O 1s for NiMoP after 1000 cycles test in 0.5 M H<sub>2</sub>SO<sub>4</sub>.

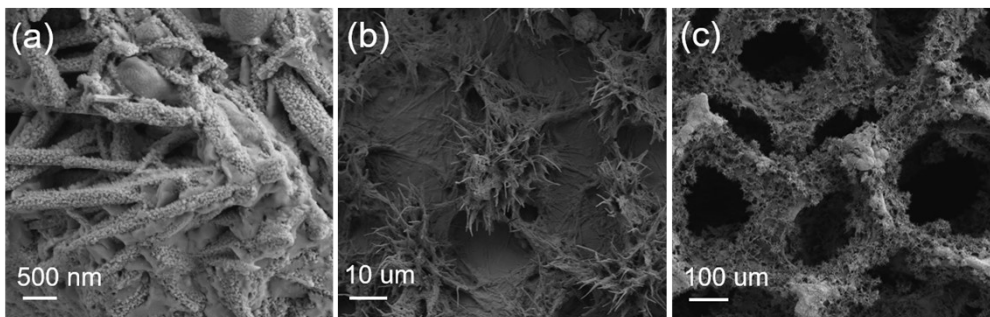

**Fig. S11** SEM images of NiMoP after 1000 cycles test at different magnifications in 1.0 M KOH.

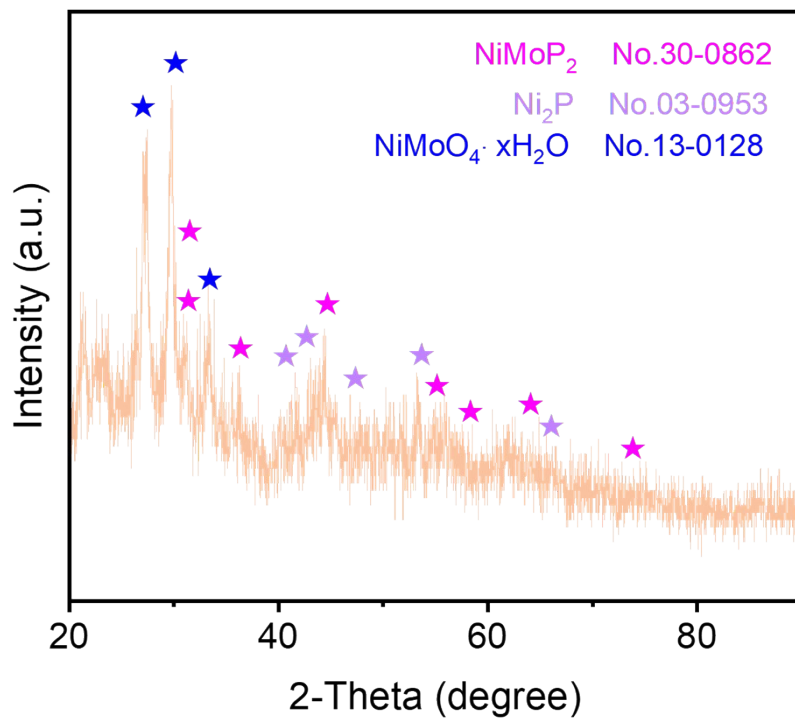

**Fig. S12** XRD pattern of NiMoP after 1000 cycles test in 1.0 M KOH.

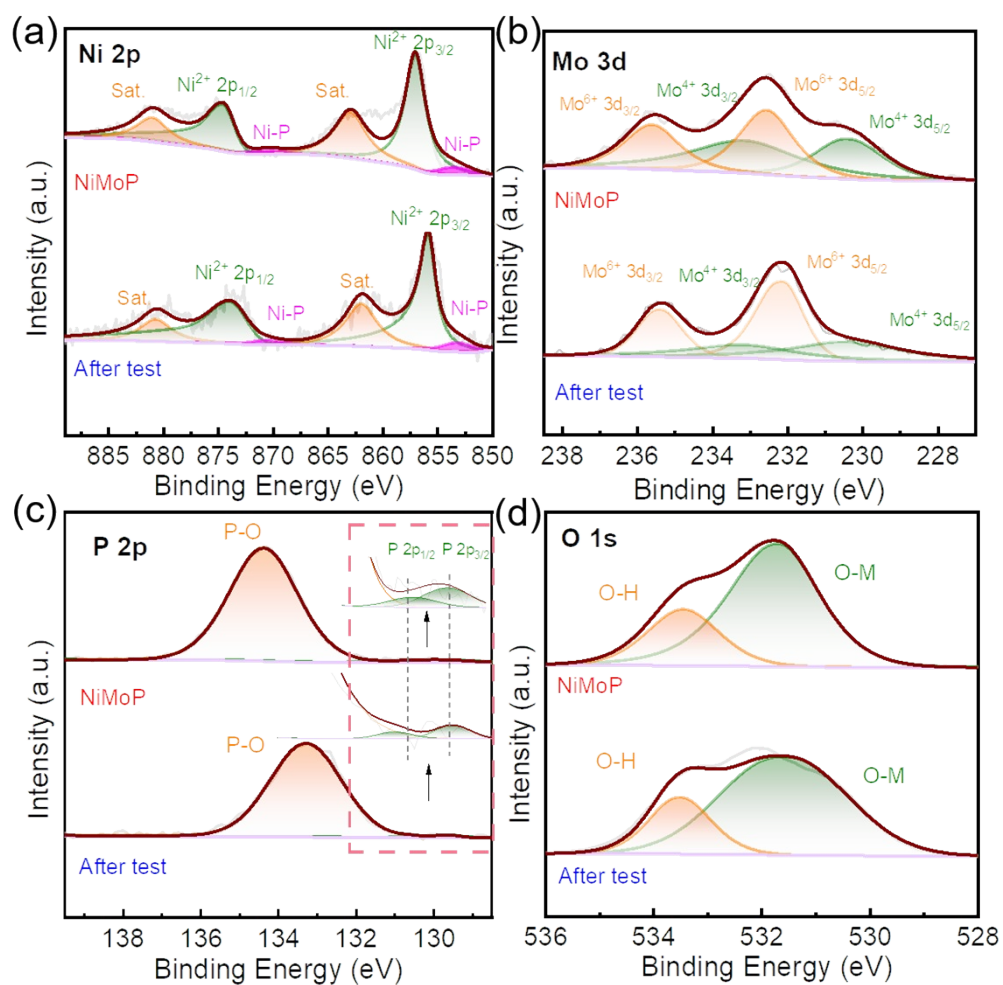

**Fig. S13** High-resolution XPS spectra of (a) Ni 2p, (b) Mo 3d, (c) P 2p, (d) O 1s for NiMoP after 1000 cycles test in 1.0 M KOH.

**Table S1.** Comparison of overpotentials at 10 mA cm<sup>-2</sup> between NiMoP and the reported transition metal phosphide based HER electrocatalysts in 0.5 M H<sub>2</sub>SO<sub>4</sub>.

| <b>Catalysts</b>           | <b>Overpotential (mV)</b> | <b>Tafel slopes</b> | <b>Refs.</b> |
|----------------------------|---------------------------|---------------------|--------------|
| NiMoP                      | 44                        | 48.78               | This Work    |
| Cu <sub>3</sub> P-CoP/CC   | 59                        | 58                  | 1            |
| CoNiP-NF/rGO               | 82                        | 37                  | 2            |
| FeCoP/C                    | 97.5                      | 43.8                | 3            |
| Ni <sub>2</sub> P-CoP      | 105                       | 64                  | 4            |
| V/CoP/Ni <sub>2</sub> P/NF | 79                        | 58.3                | 5            |
| MnCoP/Ti                   | 49                        | 55                  | 6            |
| Ni <sub>2</sub> MnP/NF     | 80                        | 64                  | 7            |
| NiCoP/CC                   | 44                        | 39                  | 8            |
| NiFeP <sub>2</sub> /CP     | 56                        | 49.5                | 9            |
| Mn-NiP <sub>2</sub> NSs/CC | 66                        | 42                  | 10           |
| Co@CoFe-P                  | 46                        | 66.27               | 11           |
| FeP NFSLs                  | 71                        | 61                  | 12           |
| MoP/S                      | 64                        | 50                  | 13           |
| Cu <sub>3</sub> P NW/CF    | 143                       | 67                  | 14           |
| WP <sub>2</sub> NSs/W      | 140                       | 67.98               | 15           |
| MoP/CNT                    | 114                       | 51.5                | 16           |
| MoP NW/CC                  | 113                       | 53.3                | 17           |

**Table S2.** Comparison of overpotentials at 10 mA cm<sup>-2</sup> between NiMoP and the reported transition metal phosphide based HER electrocatalysts in 1.0 M KOH.

| Catalysts                                 | Overpotential (mV) | Tafel slopes | Refs.     |
|-------------------------------------------|--------------------|--------------|-----------|
| NiMoP                                     | 88                 | 70           | This Work |
| Ni/NiCoP                                  | 90                 | 95           | 18        |
| Mn-CoP                                    | 95                 | 53           | 19        |
| W-CoP NAs/CC                              | 94                 | 63           | 20        |
| Co(OH) <sub>x</sub> /CoP                  | 100                | 76           | 21        |
| NiCoP/CNF                                 | 130                | 83           | 22        |
| FeCoNiP@NCNTs                             | 233.5              | 79           | 23        |
| A-Co <sub>0.9</sub> V <sub>0.1</sub> P/TF | 107                | 72           | 24        |
| sc-Ni <sub>2</sub> P <sup>δ-</sup> /NiHO  | 60                 | 75           | 25        |
| FeP NPs@NPC                               | 214                | 82           | 26        |
| Co-Fe-P/CeO <sub>2</sub> HHRs             | 69.7               | 90.1         | 27        |
| Ni-Mn-FeP                                 | 103                | 71.6         | 28        |
| Ni <sub>5%</sub> CoP                      | 84                 | 67           | 29        |
| MoP-QDs@PC                                | 98.8               | 66           | 30        |
| N/C/MoP                                   | 169                | 51.3         | 31        |
| MoP/MoO <sub>2</sub>                      | 80                 | 41           | 32        |



## References

1. H. Du, X. Zhang, Q. Tan, R. Kong and F. Qu, A Cu<sub>3</sub>P–CoP hybrid nanowire array: a superior electrocatalyst for acidic hydrogen evolution reactions, *Chem. Commun.*, 2017, **53**, 12012-12015.
2. M. Huang, K. Ge, G. Dong, Z. Zhou and Y. Zeng, 3-Dimensional flower-like clusters of CoNiP nanofoils in-situ grown on randomly-dispersed rGO-Nanosheets with superior electrocatalysis for hydrogen evolution reactions, *Int. J. Hydrogen Energy*, 2019, **44**, 13195-13204.
3. C. Wen, L. Chen, Y. Xie, J. Bai and X. Liang, MOF-derived carbon-containing Fe doped porous CoP nanosheets towards hydrogen evolution reaction and hydrodesulfurization, *Int. J. Hydrogen Energy*, 2021, **46**, 33420-33428.
4. X. Liang, B. Zheng, L. Chen, J. Zhang, Z. Zhuang and B. Chen, MOF-Derived Formation of Ni<sub>2</sub>P-CoP Bimetallic Phosphides with Strong Interfacial Effect toward Electrocatalytic Water Splitting, *ACS Appl. Mater. Interfaces*, 2017, **9**, 23222-23229.
5. L. Wang, N. Gong, Z. Zhou, W. Peng, Y. Li, F. Zhang and X. Fan, Electronic modulation of multi-element transition metal phosphide by V-doping for high-efficiency and pH-universal hydrogen evolution reaction, *Int. J. Hydrogen Energy*, 2022, **47**, 18305-18313.
6. T. Liu, X. Ma, D. Liu, S. Hao, G. Du, Y. Ma, A. M. Asiri, X. Sun and L. Chen, Mn Doping of CoP Nanosheets Array: An Efficient Electrocatalyst for Hydrogen Evolution Reaction with Enhanced Activity at All pH Values, *ACS Catal.*, 2016, **7**, 98-102.
7. D. Jiang, W. Ma, R. Yang, B. Quan, D. Li, S. Meng and M. Chen, Nickel–manganese bimetallic phosphides porous nanosheet arrays as highly active bifunctional hydrogen and oxygen evolution electrocatalysts for overall water splitting, *Electrochim. Acta*, 2020, **329**.
8. C. Du, L. Yang, F. Yang, G. Cheng and W. Luo, Nest-like NiCoP for Highly Efficient Overall Water Splitting, *ACS Catal.*, 2017, **7**, 4131-4137.
9. X. Wang, M. Pi, D. Zhang, H. Li, J. Feng, S. Chen and J. Li, Insight into the Superior Electrocatalytic Performance of a Ternary Nickel Iron Poly-Phosphide

- Nanosheet Array: An X-ray Absorption Study, *ACS Appl. Mater. Interfaces*, 2019, **11**, 14059-14065.
10. X. Wang, H. Zhou, D. Zhang, M. Pi, J. Feng and S. Chen, Mn-doped NiP<sub>2</sub> nanosheets as an efficient electrocatalyst for enhanced hydrogen evolution reaction at all pH values, *J. Power Sources*, 2018, **387**, 1-8.
  11. Y. Zhao, N. Dongfang, C. A. Triana, C. Huang, R. Erni, W. Wan, J. Li, D. Stoian, L. Pan, P. Zhang, J. Lan, M. Iannuzzi and G. R. Patzke, Dynamics and control of active sites in hierarchically nanostructured cobalt phosphide/chalcogenide-based electrocatalysts for water splitting, *Energy Environ. Sci.*, 2022, **15**, 727-739.
  12. Y. Deng, X. Xi, Y. Xia, Y. Cao, S. Xue, S. Wan, A. Dong and D. Yang, 2D FeP Nanoframe Superlattices via Space-Confined Topochemical Transformation, *Adv. Mater.*, 2022, **34**, e2109145.
  13. J. Kibsgaard and T. F. Jaramillo, Molybdenum phosphosulfide: an active, acid-stable, earth-abundant catalyst for the hydrogen evolution reaction, *Angew. Chem. Int. Ed.*, 2014, **53**, 14433-14437.
  14. J. Tian, Q. Liu, N. Cheng, A. M. Asiri and X. Sun, Self-supported Cu<sub>3</sub>P nanowire arrays as an integrated high-performance three-dimensional cathode for generating hydrogen from water, *Angew. Chem. Int. Ed.*, 2014, **53**, 9577-9581.
  15. Q. Qin, J. Li, Z. Guo, C. Jian and W. Liu, Tungsten phosphide nanosheets seamlessly grown on tungsten foils toward efficient hydrogen evolution reaction in basic and acidic media, *Int. J. Hydrogen Energy*, 2019, **44**, 27483-27491.
  16. A. Adam, M. H. Suliman, H. Dafalla, A. R. Al-Arfaj, M. N. Siddiqui and M. Qamar, Rationally Dispersed Molybdenum Phosphide on Carbon Nanotubes for the Hydrogen Evolution Reaction, *ACS Sustain. Chem. Eng.*, 2018, **6**, 11414-11423.
  17. Y. Teng, X.-D. Wang, H.-Y. Chen, J.-F. Liao, W.-G. Li and D.-B. Kuang, Iron-assisted engineering of molybdenum phosphide nanowires on carbon cloth for efficient hydrogen evolution in a wide pH range, *J. Mater. Chem. A*, 2017, **5**,

- 22790-22796.
18. Y. Lin, Y. Pan, S. Liu, K. Sun, Y. Cheng, M. Liu, Z. Wang, X. Li and J. Zhang, Construction of multi-dimensional core/shell Ni/NiCoP nano-heterojunction for efficient electrocatalytic water splitting, *Appl. Catal. B: Environ.*, 2019, **259**.
  19. X. Li, S. Li, A. Yoshida, S. Sirisomboonchai, K. Tang, Z. Zuo, X. Hao, A. Abudula and G. Guan, Mn doped CoP nanoparticle clusters: an efficient electrocatalyst for hydrogen evolution reaction, *Catal. Sci. Technol.*, 2018, **8**, 4407-4412.
  20. X. Wang, Y. Chen, B. Yu, Z. Wang, H. Wang, B. Sun, W. Li, D. Yang and W. Zhang, Hierarchically Porous W-Doped CoP Nanoflake Arrays as Highly Efficient and Stable Electrocatalyst for pH-Universal Hydrogen Evolution, *Small*, 2019, **15**, e1902613.
  21. L. Su, X. Cui, T. He, L. Zeng, H. Tian, Y. Song, K. Qi and B. Y. Xia, Surface reconstruction of cobalt phosphide nanosheets by electrochemical activation for enhanced hydrogen evolution in alkaline solution, *Chem. Sci.*, 2019, **10**, 2019-2024.
  22. S. Surendran, S. Shanmugapriya, A. Sivanantham, S. Shanmugam and R. Kalai Selvan, Electrospun Carbon Nanofibers Encapsulated with NiCoP: A Multifunctional Electrode for Supercapattery and Oxygen Reduction, Oxygen Evolution, and Hydrogen Evolution Reactions, *Adv. Energy Mater.*, 2018, **8**.
  23. S. Dong, H. Tang, K. Wang, Q. Zheng and T. Huang, Modulating the electronic structure of ternary transition metal phosphide for enhanced hydrogen evolution activity, *Dalton Trans*, 2022, **51**, 18722-18733.
  24. B. Dong, M.-X. Li, X. Shang, Y.-N. Zhou, W.-H. Hu and Y.-M. Chai, Surface reconstruction through cathodic activation of first-row transition metal phosphides for enhanced hydrogen evolution, *J. Mater. Chem. A*, 2022, **10**, 17477-17487.
  25. B. You, Y. Zhang, Y. Jiao, K. Davey and S. Z. Qiao, Negative Charging of Transition-Metal Phosphides via Strong Electronic Coupling for Destabilization of Alkaline Water, *Angew. Chem. Int. Ed.*, 2019, **58**, 11796-11800.
  26. Z. Pu, I. S. Amiinu, C. Zhang, M. Wang, Z. Kou and S. Mu, Phytic acid-

- derivative transition metal phosphides encapsulated in N,P-codoped carbon: an efficient and durable hydrogen evolution electrocatalyst in a wide pH range, *Nanoscale*, 2017, **9**, 3555-3560.
27. Q. Luo, Y. Zhao, L. Sun, C. Wang, H. Xin, J. Song, D. Li and F. Ma, Interface oxygen vacancy enhanced alkaline hydrogen evolution activity of cobalt-iron phosphide/CeO<sub>2</sub> hollow nanorods, *Chem. Eng. J.*, 2022, **437**.
  28. Y. Liu, Z. Zhang, L. Zhang, Y. Xia, H. Wang, H. Liu, S. Ge and J. Yu, Manipulating the d-band centers of transition metal phosphides through dual metal doping towards robust overall water splitting, *J. Mater. Chem. A*, 2022, **10**, 22125-22134.
  29. L. Zhao, M. Wen, Y. Tian, Q. Wu and Y. Fu, A novel structure of quasi-monolayered NiCo-bimetal-phosphide for superior electrochemical performance, *J. Energy Chem.*, 2022, **74**, 203-211.
  30. Y. Liu, C. Yue, F. Sun, W. Bao, L. Chen, Z. Zeb, C. Wang, S. Ma, C. Zhang, D. Sun, Y. Pan, Y. Huang, Y. Lu and Y. Wei, Superhydrophilic molybdenum phosphide quantum dots on porous carbon matrix for boosting hydrogen evolution reaction, *Chem. Eng. J.*, 2023, **454**.
  31. C. Wang, W. Li, X. Wang, N. Yu, H. Sun and B. Geng, Open N-doped carbon coated porous molybdenum phosphide nanorods for synergistic catalytic hydrogen evolution reaction, *Nano Res.*, 2021, **15**, 1824-1830.
  32. M. Ding, H. Xu, M. Liu, Y. Wang, A. Wang, T. Lin, L. Zhang and K. Zhang, Interface construction and porosity engineering to trigger efficient hydrogen evolution of two-dimensional porous molybdenum phosphide/dioxide heterojunction nanosheets in acidic and alkaline electrolytes, *Chem. Eng. J.*, 2022, **430**.
